# Supplementary material for: The interactions of monomeric acridines and unsymmetrical bisacridines (UAs) with DNA duplexes: an insight provided by NMR and MD studies
Source: PubMed Central journal article supplement (PMC9977845; doi:10.1038/s41598-023-30587-y), 2023-03-01
Supplement: 41598_2023_30587_MOESM1_ESM.pdf [file 41598_2023_30587_MOESM1_ESM.pdf]

# The interactions of monomeric acridines and unsymmetrical bisacridines (UAs) with DNA duplexes – an insight provided by NMR and MD studies

**Tomasz Laskowski<sup>1,\*</sup>, Michał Kosno<sup>1</sup>, Witold Andrałojć<sup>2</sup>, Joanna E. Frackowiak<sup>1</sup>, Julia Borzyszkowska-Bukowska<sup>1</sup>, Paweł Szczęblewski<sup>1</sup>, Nikola Radoń<sup>1</sup>, Maria Świerżewska<sup>1</sup>, Anna Woźny<sup>3</sup>, Ewa Paluszkiewicz<sup>1</sup>, Zofia Mazerska<sup>1</sup>**

<sup>1</sup> Department of Pharmaceutical Technology and Biochemistry and BioTechMed Centre, Faculty of Chemistry, Gdańsk University of Technology, Gdańsk, Gabriela Narutowicza Str. 11/12, 80-233, Poland

<sup>2</sup> Institute of Bioorganic Chemistry, Polish Academy of Sciences, Poznań, Zygmunta Noskowskiego Str. 12/14, 61-704, Poland

<sup>3</sup> Faculty of Applied Physics and Mathematics, Gdańsk University of Technology, Gdańsk, Gabriela Narutowicza Str. 11/12, 80-233, Poland

\* [tomasz.laskowski@pg.edu.pl](mailto:tomasz.laskowski@pg.edu.pl)

## SUPPLEMENTARY DATA

## CONTENTS:

|                                                                                                                                                                                                                                                                                                                                                                                               |    |
|-----------------------------------------------------------------------------------------------------------------------------------------------------------------------------------------------------------------------------------------------------------------------------------------------------------------------------------------------------------------------------------------------|----|
| <b>Figure S1.</b> The H6/H8-H1' NOESY-walks for the A and B strands of dsDNA duplex, traced for the $d(\text{CGATATCG})_2\text{:C-1311}$ complex ( <b>D2L</b> ). .....                                                                                                                                                                                                                        | 3  |
| <b>Figure S2.</b> The H6/H8-H1' NOESY-walks for the A and B strands of dsDNA duplex, traced for the $d(\text{CCCTAGGG})_2\text{:C-1311}$ complex ( <b>D3L</b> ). .....                                                                                                                                                                                                                        | 4  |
| <b>Figure S3.</b> The H6/H8-H1' NOESY-walks for the A and B strands of dsDNA duplex, traced for the $d(\text{CGCTAGCG})_2\text{:C-1305}$ complex ( <b>B2L</b> ). .....                                                                                                                                                                                                                        | 5  |
| <b>Figure S4.</b> Codenames assigned to the protons of C-1311 (Symadex) and C-1305. ....                                                                                                                                                                                                                                                                                                      | 6  |
| <b>Table S1.</b> $^1\text{H}$ NMR chemical shifts ( $\delta$ [ppm], referenced to TSP residual signal set to 0.000 ppm) of the protons of the ligands, as well as the protons of the DNA duplexes forming the $d(\text{CGATATCG})_2\text{:C-1311}$ ( <b>D2L</b> ), $d(\text{CCCTAGGG})_2\text{:C-1311}$ ( <b>D3L</b> ) and $d(\text{CGCTAGCG})_2\text{:C-1305}$ ( <b>B2L</b> ) complexes..... | 6  |
| <b>Table S2.</b> $^1\text{H}$ NMR chemical shifts ( $\delta$ [ppm], referenced to TSP residual signal set to 0.000 ppm) of the protons of the free $d(\text{CGCTAGCG})_2$ DNA duplex.....                                                                                                                                                                                                     | 8  |
| <b>Figure S5.</b> UV-VIS and chemometric analysis of C-1305 and C-1311 binding to DNA duplexes: spectra resulting from titration. ....                                                                                                                                                                                                                                                        | 9  |
| <b>Figure S6.</b> A comparison of the UV-VIS spectra of the free monoacridines, i.e. C-1305 and C-1311, and bound to a dsDNA sequence with 1:1 mol/mol stoichiometry.....                                                                                                                                                                                                                     | 9  |
| <b>Figure S7.</b> UV-VIS and chemometric analysis of C-1305 and C-1311 binding to DNA duplexes: spectra of the principal components.....                                                                                                                                                                                                                                                      | 10 |
| <b>Figure S8.</b> UV-VIS and chemometric analysis of C-1305 and C-1311 binding to DNA duplexes: molar fractions.....                                                                                                                                                                                                                                                                          | 10 |
| <b>Figure S9.</b> UV-VIS and chemometric analysis of C-1305 and C-1311 binding to DNA duplexes: Scatchard plots.....                                                                                                                                                                                                                                                                          | 11 |
| <b>Table S3.</b> Interactions of unsymmetrical bisacridines (UAs), i.e. C-2028, C-2041, C-2045, and C-2053, with dsDNA duplexes.....                                                                                                                                                                                                                                                          | 11 |
| <b>Table S4.</b> The definition of distance restraints used in molecular dynamics simulations.....                                                                                                                                                                                                                                                                                            | 11 |
| <b>Figure S10.</b> Titration experiments, performed for Nitracrine and C-1748, using $d(\text{CGATATCG})_2$ ( <b>D2</b> ) dsDNA hosting duplex. ....                                                                                                                                                                                                                                          | 12 |

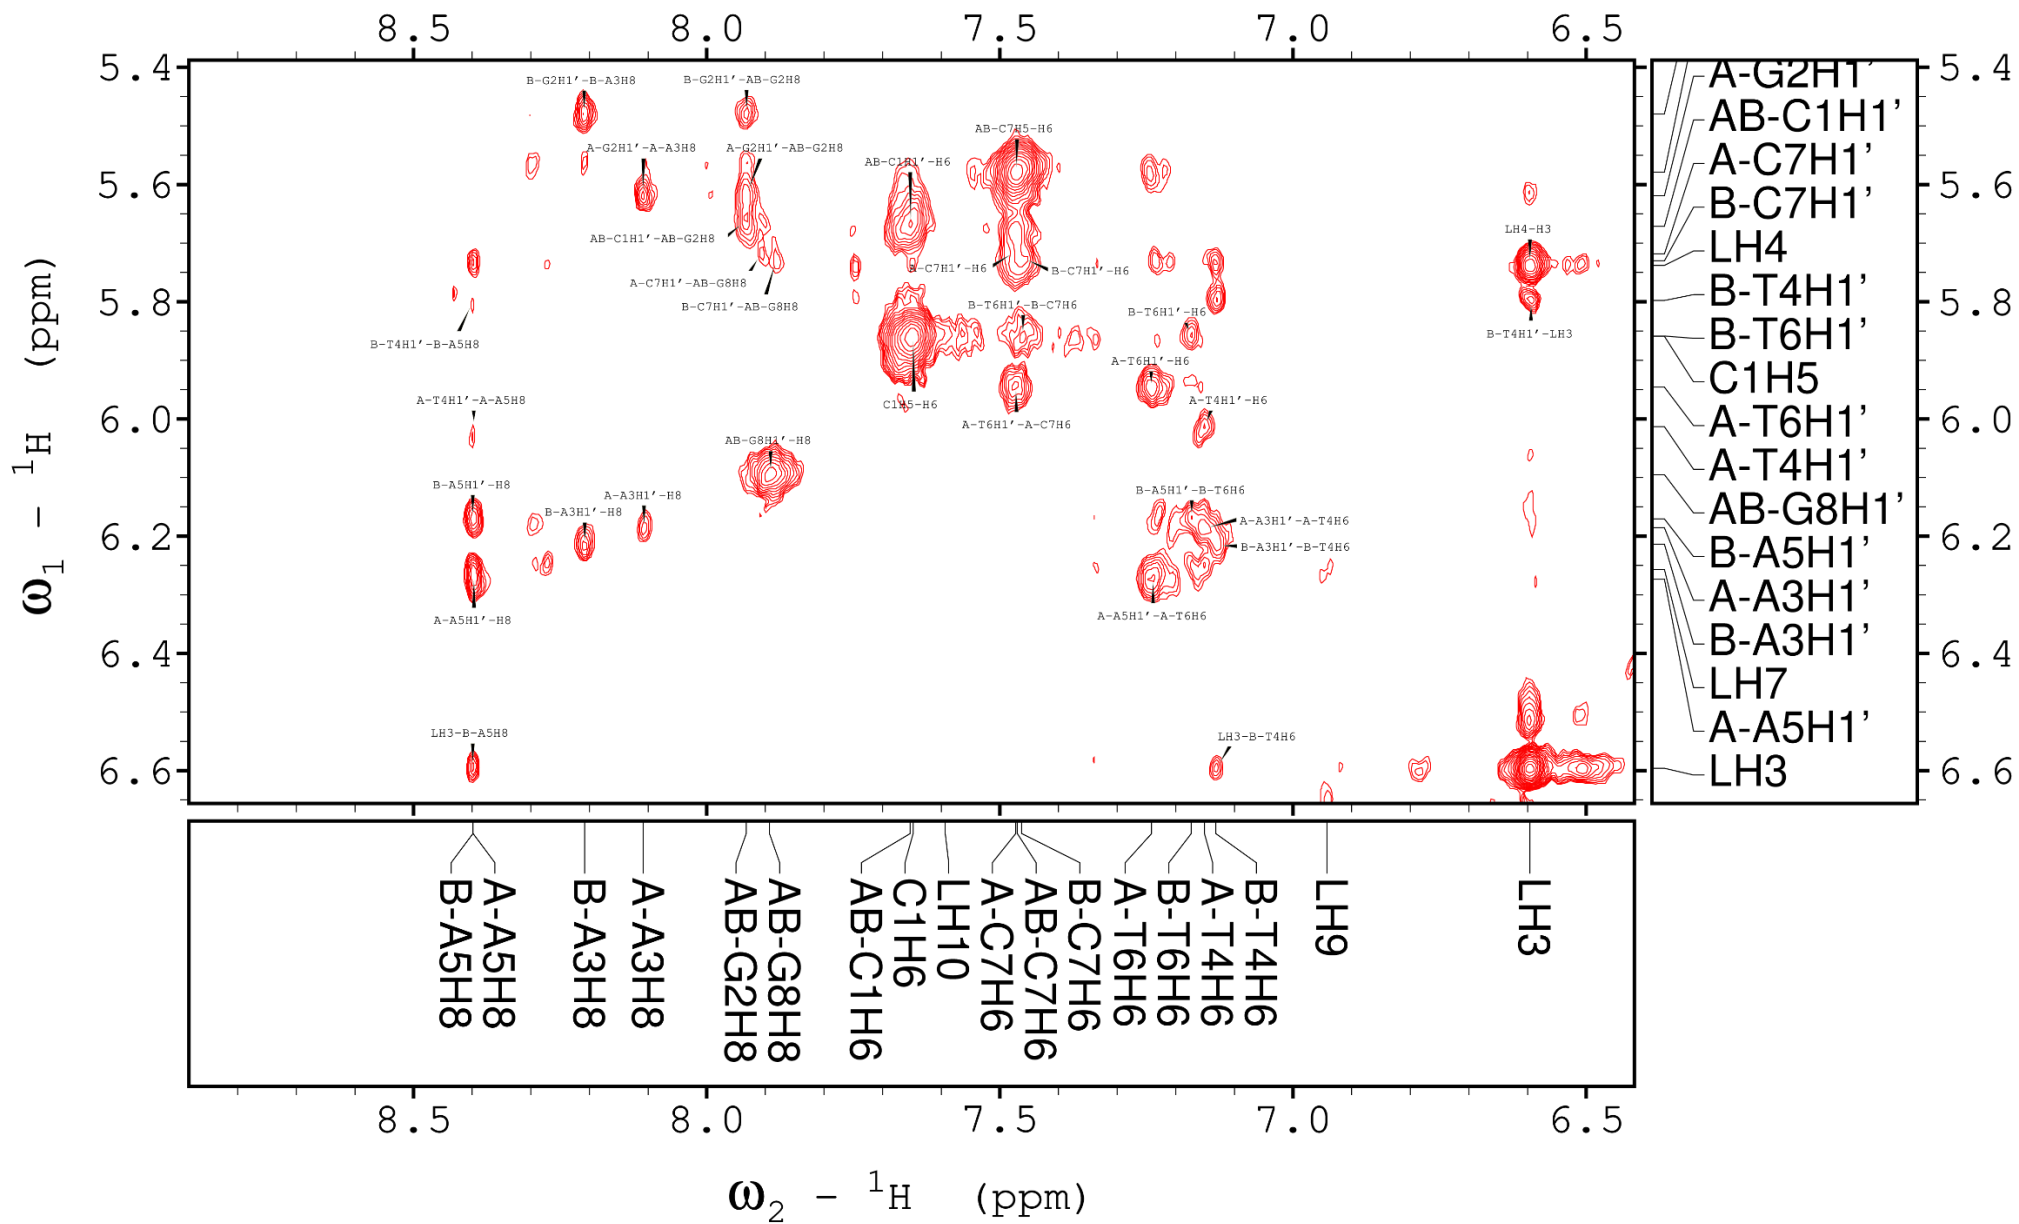

**Figure S1.** The H6/H8-H1' NOESY-walks for the A and B strands of dsDNA duplex, traced for the d(CGATATCG)<sub>2</sub>:C-1311 complex (D2L).

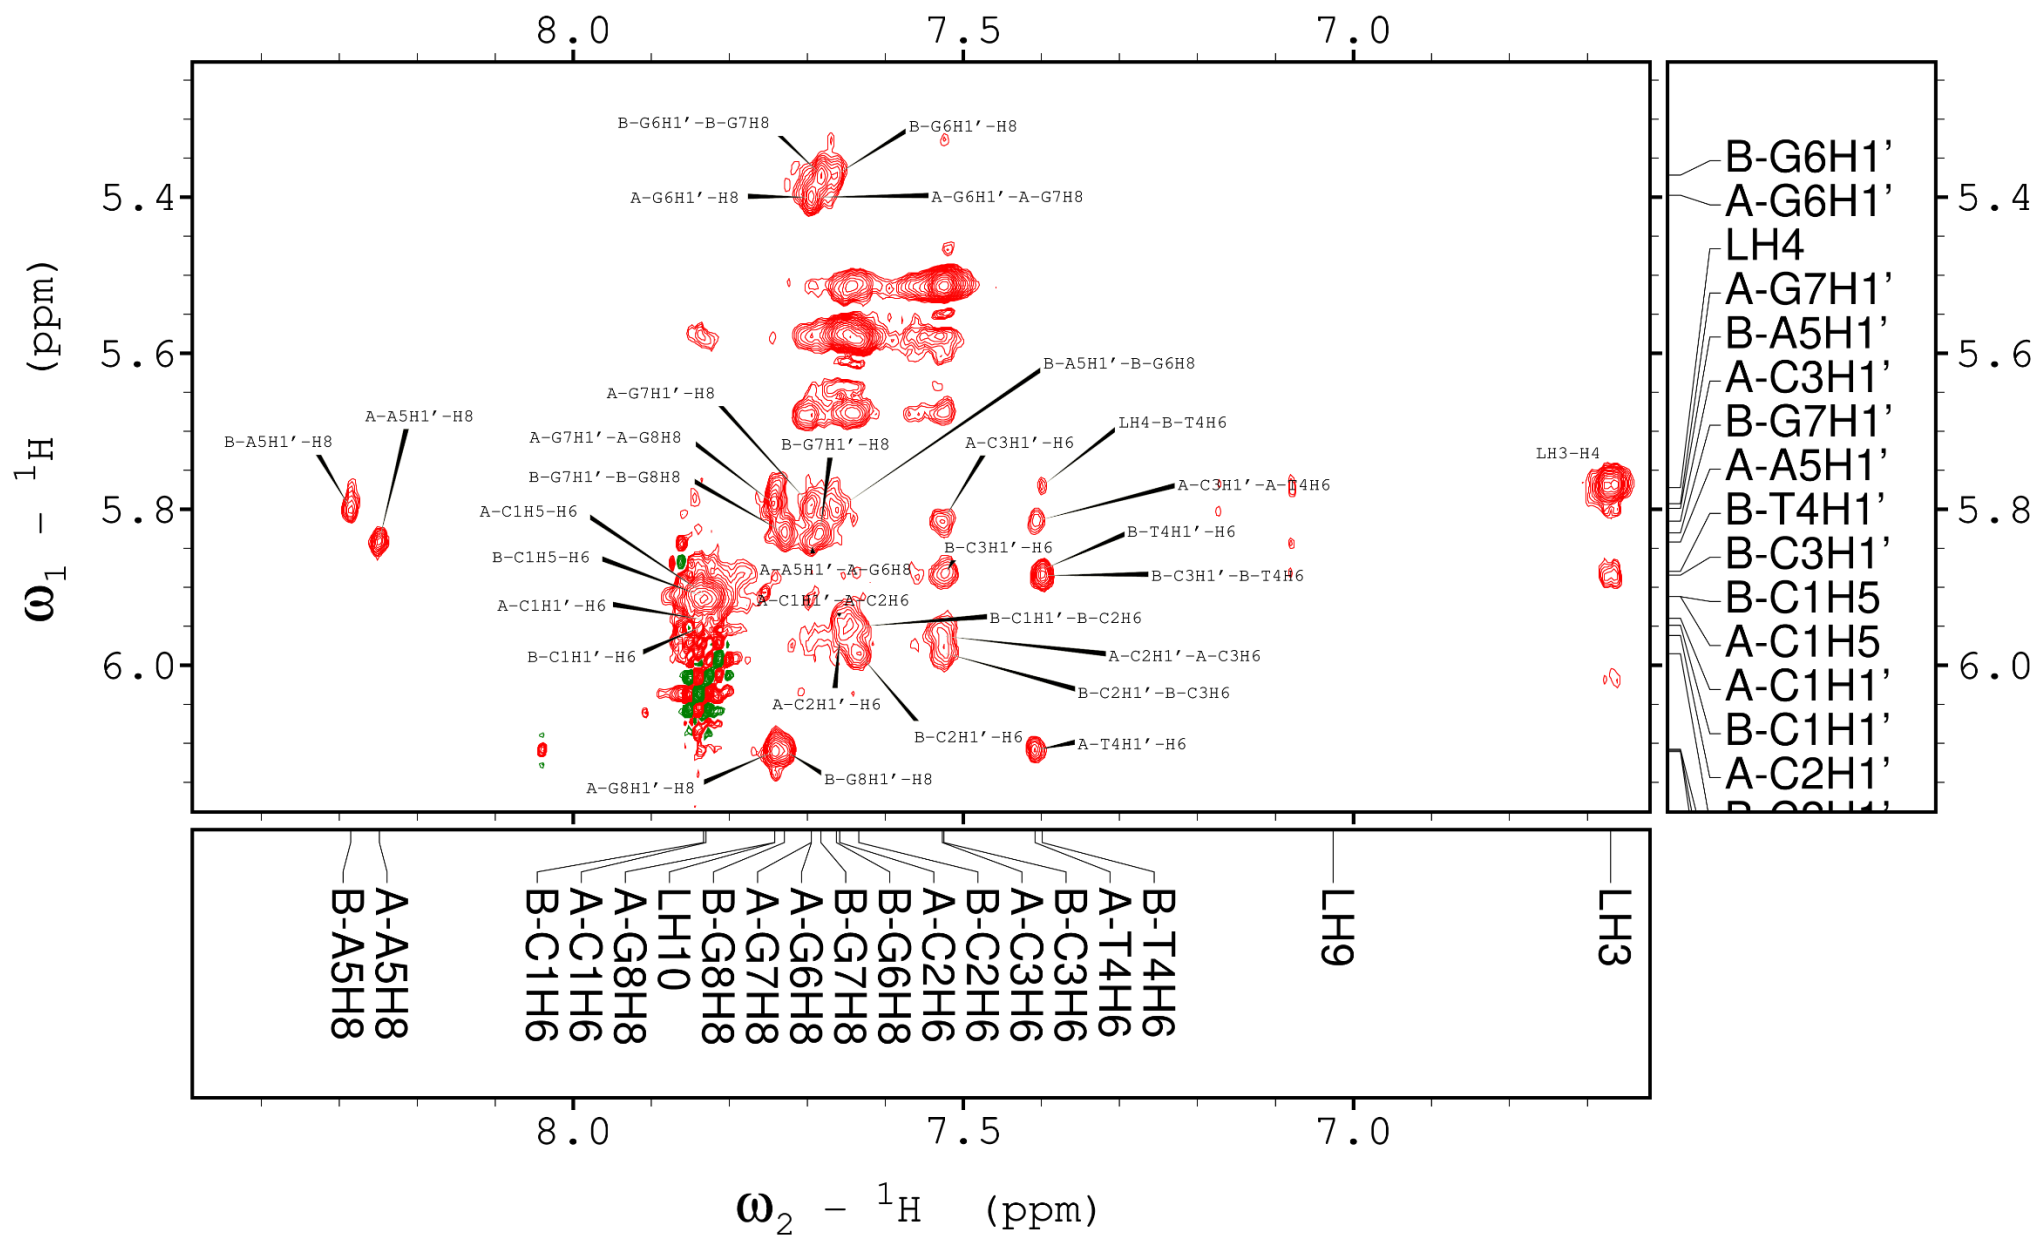

**Figure S2.** The H6/H8-H1' NOESY-walks for the A and B strands of dsDNA duplex, traced for the d(CCCTAGGG)<sub>2</sub>:C-1311 complex (**D3L**).

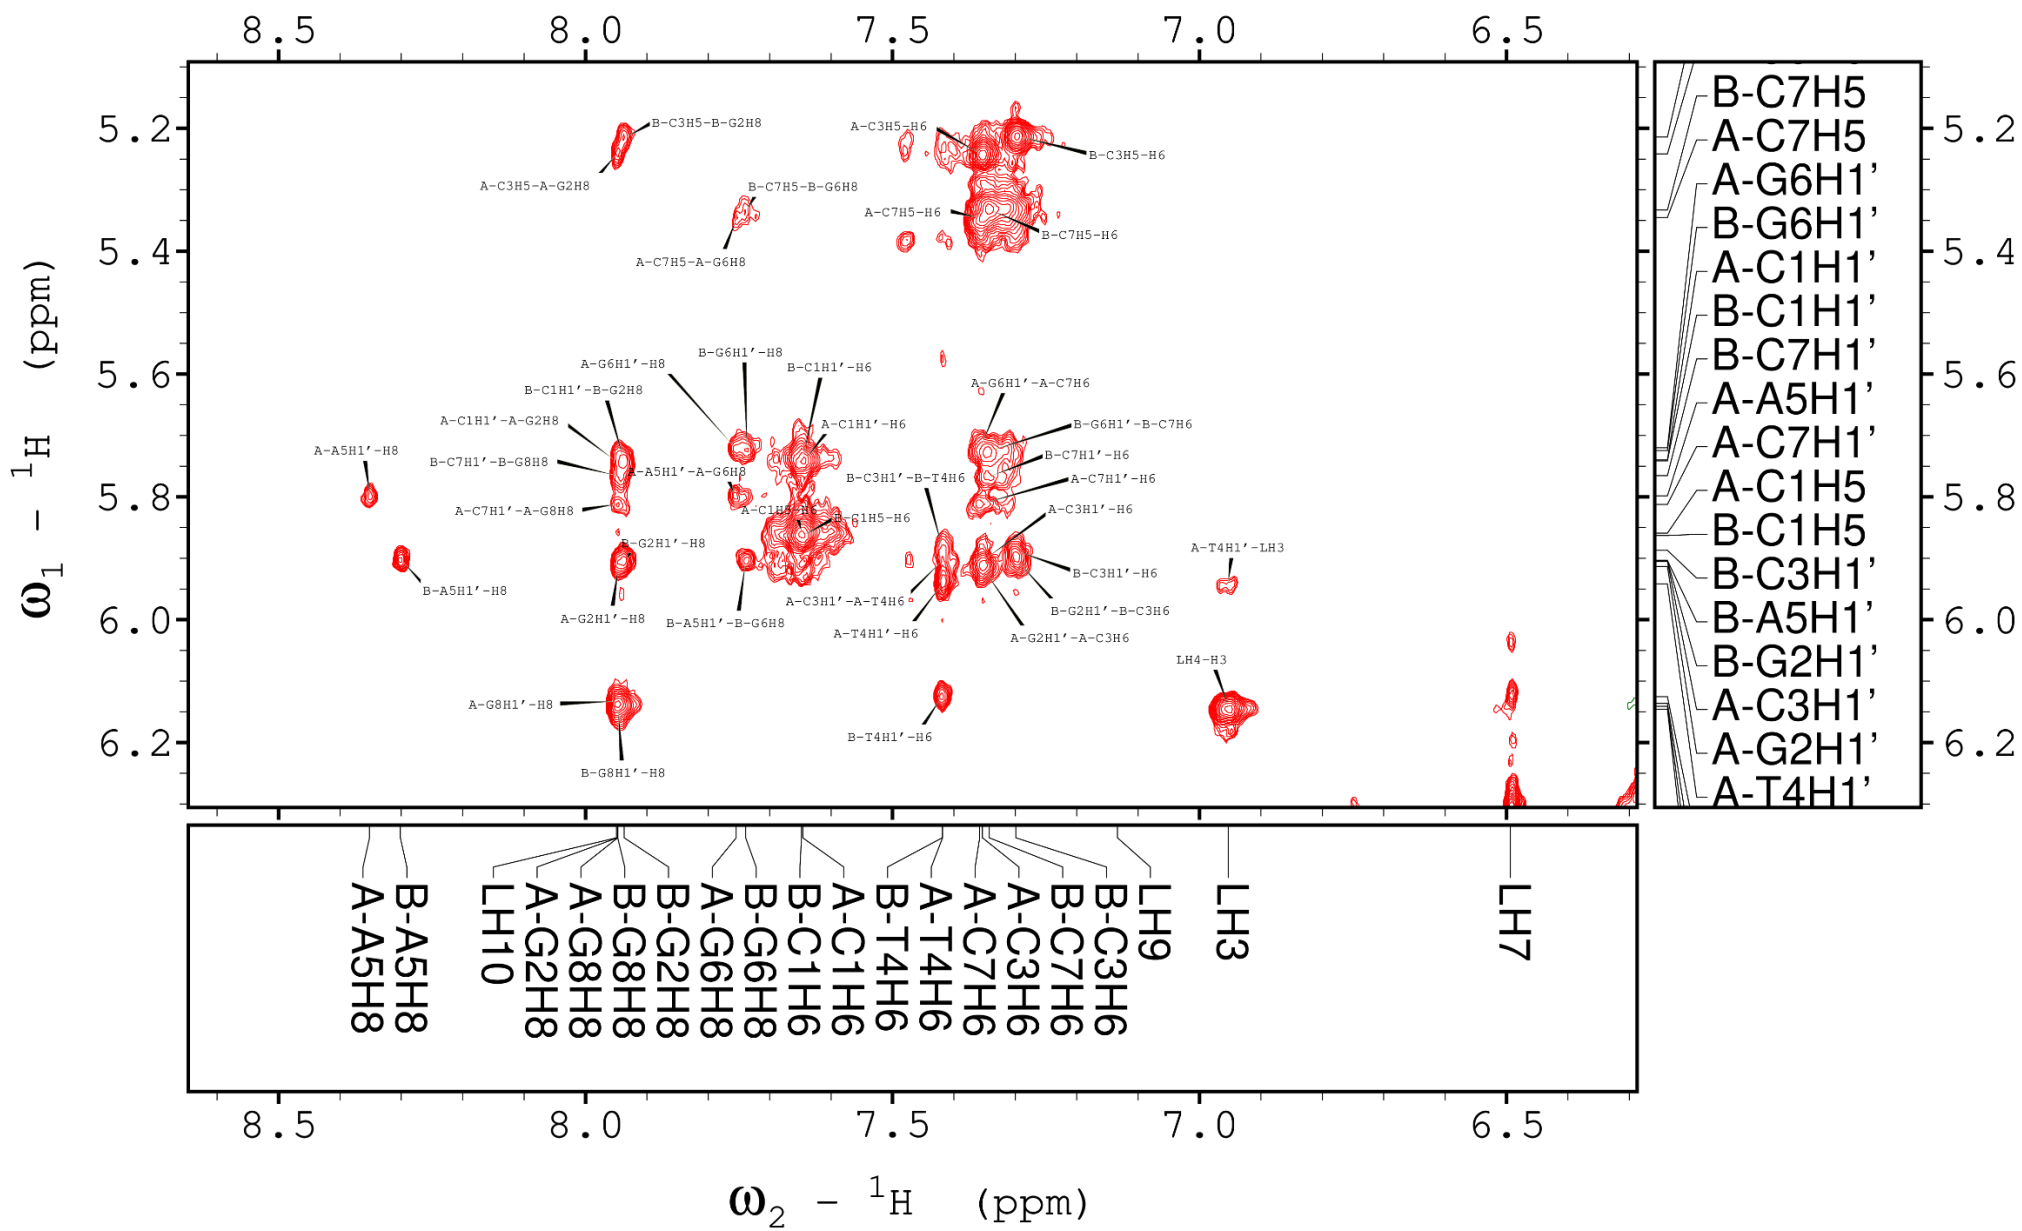

**Figure S3.** The H6/H8-H1' NOESY-walks for the A and B strands of dsDNA duplex, traced for the d(CGCTAGCG)<sub>2</sub>:C-1305 complex (**B2L**).

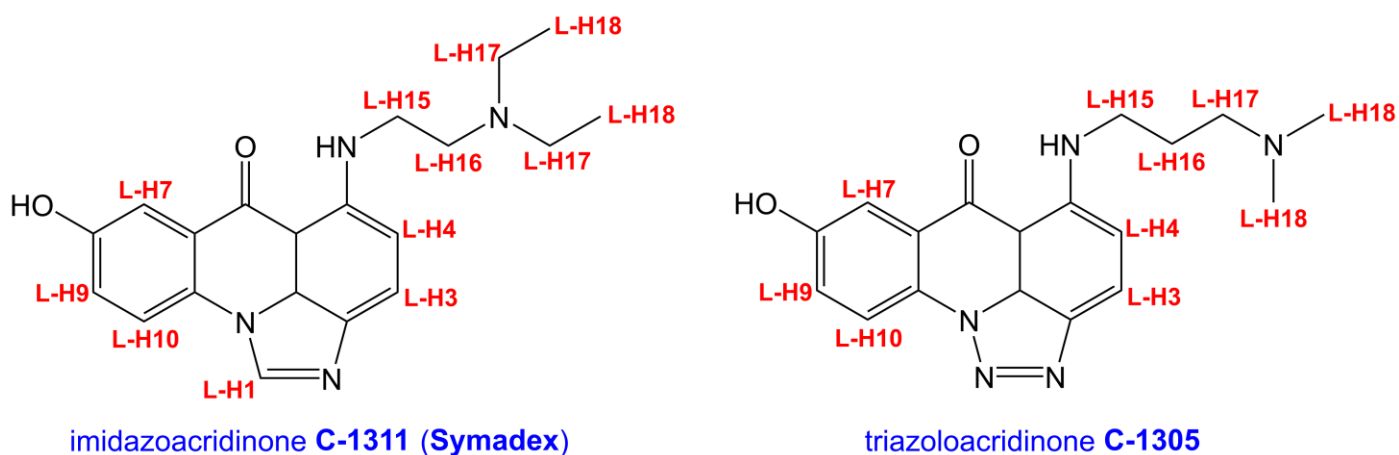

**Figure S4.** Codenames assigned to the protons of C-1311 (Symadex) and C-1305.

**Table S1.**  $^1\text{H}$  NMR chemical shifts ( $\delta$  [ppm], referenced to TSP residual signal set to 0.000 ppm) of the protons of the ligands, as well as the protons of the DNA duplexes forming the  $d(\text{CGATATCG})_2\text{:C-1311}$  (**D2L**),  $d(\text{CCCTAGGG})_2\text{:C-1311}$  (**D3L**) and  $d(\text{CGCTAGCG})_2\text{:C-1305}$  (**B2L**) complexes. Deoxyribose protons H4', H5' and H5'' were not listed due to severe superpositions of proton resonances. Chemical shifts of the protons of the free **D2** and **D3** duplexes were given in the Reference 11 (see the main manuscript); chemical shifts of the protons of the free **B2** duplex were listed in Table S2.

| d(CGATATCG) <sub>2</sub> :C-1311 complex (D2L) |                | d(CCCTAGGG) <sub>2</sub> :C-1311 complex (D3L) |                | d(CGCTAGCG) <sub>2</sub> :C-1305 complex (B2L) |                |
|------------------------------------------------|----------------|------------------------------------------------|----------------|------------------------------------------------|----------------|
| proton                                         | $\delta$ (ppm) | proton                                         | $\delta$ (ppm) | proton                                         | $\delta$ (ppm) |
| <b>ligand (C-1311)</b>                         |                | <b>ligand (C-1311)</b>                         |                | <b>ligand (C-1305)</b>                         |                |
| L-H1                                           | 8.403          | L-H1                                           | 8.497          | L-H3                                           | 6.953          |
| L-H3                                           | 6.596          | L-H3                                           | 6.670          | L-H4                                           | 6.146          |
| L-H4                                           | 5.738          | L-H4                                           | 5.772          | L-H7                                           | 6.494          |
| L-H7                                           | 6.257          | L-H7                                           | 6.417          | L-H9                                           | 7.134          |
| L-H9                                           | 6.942          | L-H9                                           | 7.026          | L-H10                                          | 7.950          |
| L-H10                                          | 7.593          | L-H10                                          | 7.742          | L-H15                                          | 3.418          |
| L-H15                                          | 3.611          | L-H15                                          | 3.576          | L-H16                                          | 3.273          |
| L-H16                                          | 3.458          | L-H16                                          | 3.450          | L-H17                                          | 3.273          |
| L-H17                                          | 3.365          | L-H17                                          | 3.323          | L-H18                                          | 2.947          |
| L-H18                                          | 1.426          | L-H18                                          | 1.360          |                                                |                |
| <b>DNA duplex</b>                              |                |                                                |                |                                                |                |
| A-C1H1'                                        | 5.671          | A-C1H1'                                        | 5.940          | A-C1H1'                                        | 5.740          |
| A-C1H2''                                       | 2.390          | A-C1H2'                                        | 2.214          | A-C1H2'                                        | 2.012          |
| A-C1H2'                                        | 2.378          | A-C1H2''                                       | 2.242          | A-C1H2''                                       | 2.434          |
| A-C1H3'                                        | 4.684          | A-C1H3'                                        | 4.653          | A-C1H3'                                        | 4.716          |
| A-C1H5                                         | 5.859          | A-C1H5                                         | 5.912          | A-C1H5                                         | 5.859          |
| A-C1H6                                         | 7.653          | A-C1H6                                         | 7.830          | A-C1H6                                         | 7.646          |
| B-C1H1'                                        | 5.671          | B-C1H1'                                        | 5.949          | B-C1H1'                                        | 5.741          |
| B-C1H2''                                       | 2.390          | B-C1H2'                                        | 2.210          | B-C1H2'                                        | 2.004          |
| B-C1H2'                                        | 2.378          | B-C1H2''                                       | 2.235          | B-C1H2''                                       | 2.424          |
| B-C1H3'                                        | 4.684          | B-C1H3'                                        | 4.658          | B-C1H3'                                        | 4.716          |
| B-C1H5                                         | 5.859          | B-C1H5                                         | 5.912          | B-C1H5                                         | 5.863          |
| B-C1H6                                         | 7.653          | B-C1H6                                         | 7.833          | B-C1H6                                         | 7.648          |
| A-G2H1'                                        | 5.619          | A-C2H1'                                        | 5.962          | A-G2H1'                                        | 5.914          |
| A-G2H2''                                       | 2.742          | A-C2H2'                                        | 2.313          | A-G2H2'                                        | 2.664          |
| A-G2H2'                                        | 2.722          | A-C2H2''                                       | 2.466          | A-G2H2''                                       | 2.705          |
| A-G2H3'                                        | 4.990          | A-C2H3'                                        | 4.834          | A-G2H3'                                        | 4.979          |
| A-G2H8                                         | 7.933          | A-C2H6                                         | 7.659          | A-G2H8                                         | 7.948          |

|         |       |         |       |         |       |
|---------|-------|---------|-------|---------|-------|
| B-G2H1' | 5.480 | B-C2H1' | 5.985 | B-G2H1' | 5.904 |
| B-G2H2" | 2.742 | B-C2H2' | 2.232 | B-G2H2' | 2.666 |
| B-G2H2' | 2.722 | B-C2H2" | 2.472 | B-G2H2" | 2.704 |
| B-G2H3' | 4.990 | B-C2H3' | 4.853 | B-G2H3' | 4.974 |
| B-G2H8  | 7.933 | B-C2H6  | 7.634 | B-G2H8  | 7.937 |
| A-A3H1' | 6.186 | A-C3H1' | 5.815 | A-C3H1' | 5.905 |
| A-A3H2" | 2.833 | A-C3H2' | 2.040 | A-C3H2' | 2.459 |
| A-A3H2' | 2.537 | A-C3H2" | 2.433 | A-C3H2" | 2.702 |
| A-A3H3' | 4.948 | A-C3H3' | 4.701 | A-C3H3' | 4.765 |
| A-A3H8  | 8.108 | A-C3H6  | 7.527 | A-C3H5  | 5.242 |
| B-A3H1' | 6.214 | B-C3H1' | 5.884 | A-C3H6  | 7.354 |
| B-A3H2" | 2.902 | B-C3H2' | 2.019 | B-C3H1' | 5.887 |
| B-A3H2' | 2.586 | B-C3H2" | 2.450 | B-C3H2' | 2.428 |
| B-A3H3' | 5.039 | B-C3H3' | 4.794 | B-C3H2" | 2.691 |
| B-A3H8  | 8.208 | B-C3H6  | 7.525 | B-C3H3' | 4.658 |
| A-T4CH3 | 1.190 | A-T4CH3 | 1.489 | B-C3H5  | 5.214 |
| A-T4H1' | 6.013 | A-T4H1' | 6.108 | B-C3H6  | 7.299 |
| A-T4H2" | 2.538 | A-T4H2' | 2.592 | A-T4CH3 | 1.641 |
| A-T4H2' | 2.491 | A-T4H2" | 2.606 | A-T4H1' | 5.942 |
| A-T4H3' | 4.972 | A-T4H3' | 4.998 | A-T4H2' | 2.487 |
| A-T4H6  | 7.151 | A-T4H6  | 7.408 | A-T4H2" | 2.617 |
| B-T4CH3 | 1.388 | B-T4CH3 | 1.644 | A-T4H3' | 5.018 |
| B-T4H1' | 5.798 | B-T4H1' | 5.880 | A-T4H6  | 7.418 |
| B-T4H2" | 2.386 | B-T4H2' | 2.473 | B-T4CH3 | 1.465 |
| B-T4H2' | 2.328 | B-T4H2" | 2.488 | B-T4H1' | 6.125 |
| B-T4H3' | 4.990 | B-T4H3' | 5.007 | B-T4H2' | 2.477 |
| B-T4H6  | 7.132 | B-T4H6  | 7.399 | B-T4H2" | 2.615 |
| A-A5H1' | 6.273 | A-A5H1' | 5.842 | B-T4H3' | 5.018 |
| A-A5H2" | 2.952 | A-A5H2' | 2.770 | B-T4H6  | 7.419 |
| A-A5H2' | 2.815 | A-A5H2" | 2.806 | A-A5H1' | 5.798 |
| A-A5H3' | 4.993 | A-A5H3' | 4.979 | A-A5H2' | 2.783 |
| A-A5H8  | 8.398 | A-A5H8  | 8.249 | A-A5H2" | 2.802 |
| B-A5H1' | 6.171 | B-A5H1' | 5.799 | A-A5H3' | 4.963 |
| B-A5H2" | 2.935 | B-A5H2' | 2.712 | A-A5H8  | 8.352 |
| B-A5H2' | 2.699 | B-A5H2" | 2.793 | B-A5H1' | 5.904 |
| B-A5H3' | 4.938 | B-A5H3' | 4.917 | B-A5H2' | 2.809 |
| B-A5H8  | 8.399 | B-A5H8  | 8.285 | B-A5H2" | 2.837 |
| A-T6CH3 | 1.188 | A-G6H1' | 5.398 | B-A5H3' | 5.001 |
| A-T6H1' | 5.946 | A-G6H2' | 2.547 | B-A5H8  | 8.302 |
| A-T6H2" | 2.415 | A-G6H2" | 2.579 | A-G6H1' | 5.720 |
| A-T6H2' | 2.080 | A-G6H3' | 4.954 | A-G6H2' | 2.556 |
| A-T6H3' | 4.859 | A-G6H8  | 7.695 | A-G6H2" | 2.574 |
| A-T6H6  | 7.241 | B-G6H1' | 5.372 | A-G6H3' | 4.976 |
| B-T6CH3 | 1.246 | B-G6H2' | 2.547 | A-G6H8  | 7.755 |
| B-T6H1' | 5.859 | B-G6H2" | 2.572 | B-G6H1' | 5.725 |
| B-T6H2" | 2.407 | B-G6H3' | 4.944 | B-G6H2' | 2.557 |
| B-T6H2' | 2.028 | B-G6H8  | 7.663 | B-G6H2" | 2.574 |
| B-T6H3' | 4.817 | A-G7H1' | 5.793 | B-G6H3' | 4.975 |
| B-T6H6  | 7.174 | A-G7H2' | 2.584 | B-G6H8  | 7.739 |
| A-C7H1' | 5.719 | A-G7H2" | 2.743 | A-C7H1' | 5.812 |
| A-C7H2" | 2.400 | A-G7H3' | 4.981 | A-C7H2' | 2.371 |
| A-C7H2' | 2.322 | A-G7H8  | 7.695 | A-C7H2" | 2.569 |
| A-C7H3' | 4.825 | B-G7H1' | 5.830 | A-C7H3' | 4.853 |
| A-C7H5  | 5.579 | B-G7H2' | 2.579 | A-C7H5  | 5.345 |
| A-C7H6  | 7.470 | B-G7H2" | 2.763 | A-C7H6  | 7.358 |
| B-C7H1' | 5.730 | B-G7H3' | 4.981 | B-C7H1' | 5.766 |
| B-C7H2" | 2.400 | B-G7H8  | 7.683 | B-C7H2' | 2.359 |
| B-C7H2' | 2.322 | A-G8H1' | 6.109 | B-C7H2" | 2.569 |
| B-C7H3' | 4.825 | A-G8H2' | 2.495 | B-C7H3' | 4.835 |
| B-C7H5  | 5.579 | A-G8H2" | 2.330 | B-C7H5  | 5.333 |
| B-C7H6  | 7.470 | A-G8H3' | 4.646 | B-C7H6  | 7.342 |

|          |       |          |       |          |       |
|----------|-------|----------|-------|----------|-------|
| A-G8H1'  | 6.095 | A-G8H8   | 7.742 | A-G8H1'  | 6.136 |
| A-G8H2'' | 2.337 | B-G8H1'  | 6.111 | A-G8H2'  | 2.656 |
| A-G8H2'  | 2.672 | B-G8H2'  | 2.505 | A-G8H2'' | 2.363 |
| A-G8H3'  | 4.691 | B-G8H2'' | 2.337 | A-G8H3'  | 4.687 |
| A-G8H8   | 7.893 | B-G8H3'  | 4.646 | A-G8H8   | 7.948 |
| B-G8H1'  | 6.095 | B-G8H8   | 7.730 | B-G8H1'  | 6.141 |
| B-G8H2'' | 2.337 |          |       | B-G8H2'  | 2.645 |
| B-G8H2'  | 2.672 |          |       | B-G8H2'' | 2.357 |
| B-G8H3'  | 4.691 |          |       | B-G8H3'  | 4.687 |
| B-G8H8   | 7.893 |          |       | B-G8H8   | 7.948 |

**Table S2.** <sup>1</sup>H NMR chemical shifts ( $\delta$  [ppm], referenced to TSP residual signal set to 0.000 ppm) of the protons of the free d(CGCTAGCG)<sub>2</sub> DNA duplex.

| proton | $\delta$ (ppm) | proton | $\delta$ (ppm) |
|--------|----------------|--------|----------------|
| C1H1'  | 5.634          | A5H1'  | 5.891          |
| C1H2'  | 1.904          | A5H2   | 7.188          |
| C1H2'' | 2.324          | A5H2'  | 2.610          |
| C1H3'  | 4.581          | A5H2'' | 2.751          |
| C1H4'  | 3.934          | A5H3'  | 4.910          |
| C1H5   | 5.785          | A5H4'  | 4.275          |
| C1H5'  | 3.585          | A5H5'  | 3.928          |
| C1H5'' | 3.594          | A5H5'' | 4.000          |
| C1H6   | 7.536          | A5H8   | 8.110          |
| G2H1'  | 5.820          | G6H1'  | 5.573          |
| G2H2'  | 2.590          | G6H2'  | 2.365          |
| G2H2'' | 2.622          | G6H2'' | 2.469          |
| G2H3'  | 4.860          | G6H3'  | 4.820          |
| G2H4'  | 4.244          | G6H4'  | 4.236          |
| G2H5'  | 3.869          | G6H5'  | 4.040          |
| G2H5'' | 3.976          | G6H5'' | 4.057          |
| G2H8   | 7.874          | G6H8   | 7.591          |
| C3H1'  | 5.847          | C7H1'  | 5.580          |
| C3H2'  | 1.941          | C7H2'  | 1.746          |
| C3H2'' | 2.376          | C7H2'' | 2.195          |
| C3H3'  | 4.644          | C7H3'  | 4.657          |
| C3H4'  | 4.114          | C7H4'  | 4.000          |
| C3H5   | 5.237          | C7H5   | 5.192          |
| C3H5'  | 4.037          | C7H5'  | 3.946          |
| C3H5'' | 4.049          | C7H5'' | 3.960          |
| C3H6   | 7.331          | C7H6   | 7.171          |
| T4H1'  | 5.429          | G8H1'  | 6.020          |
| T4H2'  | 2.035          | G8H2'  | 2.478          |
| T4H2'' | 2.331          | G8H2'' | 2.195          |
| T4H3'  | 4.737          | G8H3'  | 4.527          |
| T4H4'  | 4.006          | G8H4'  | 4.035          |
| T4H5'  | 3.925          | G8H5'  | 3.907          |
| T4H5'' | 3.959          | G8H5'' | 3.919          |
| T4H6   | 7.308          | G8H8   | 7.812          |



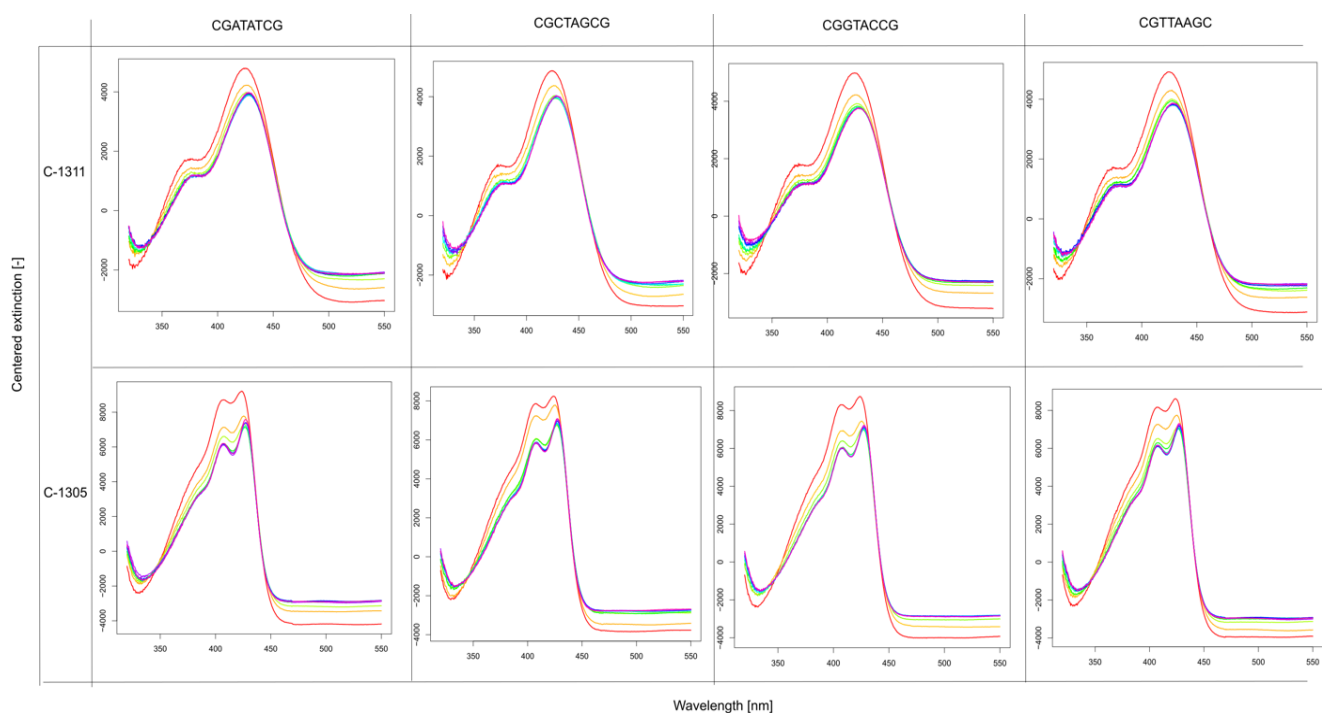

**Figure S5.** UV-VIS and chemometric analysis of C-1305 and C-1311 binding to DNA duplexes: spectra resulting from titration.

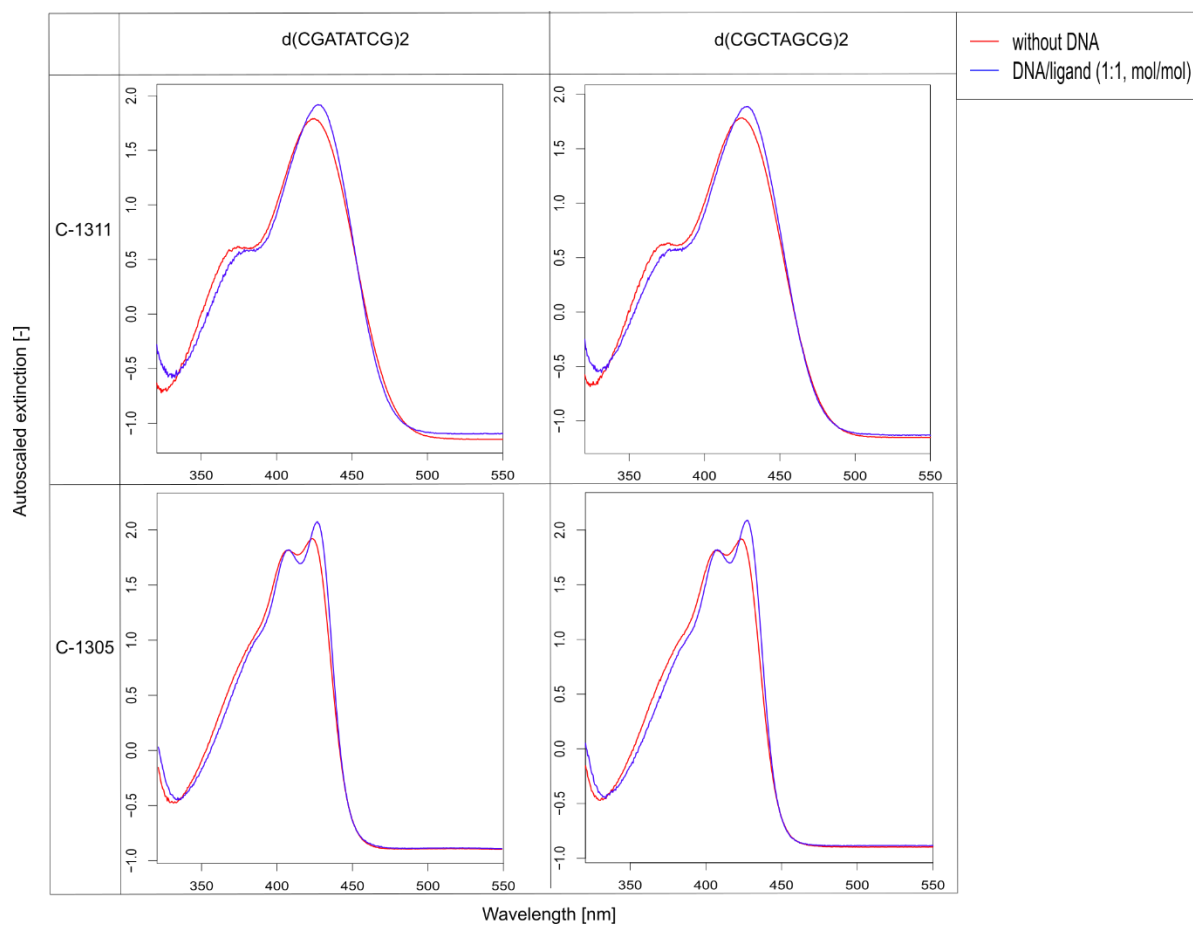

**Figure S6.** A comparison of the UV-VIS spectra of the free monoacridines, i.e. C-1305 and C-1311 (red line), and bound to a dsDNA sequence with 1:1 mol/mol stoichiometry (blue line).

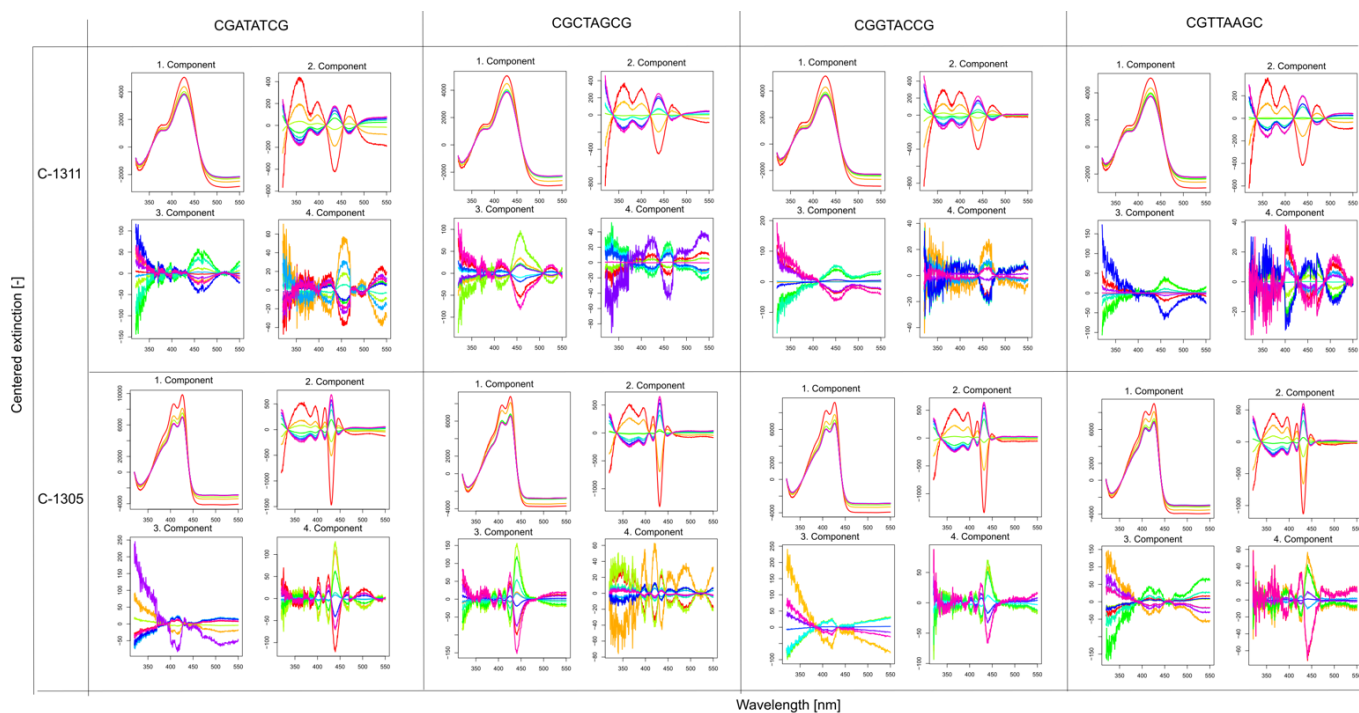

**Figure S7.** UV-VIS and chemometric analysis of C-1305 and C-1311 binding to DNA duplexes: spectra of the principal components.

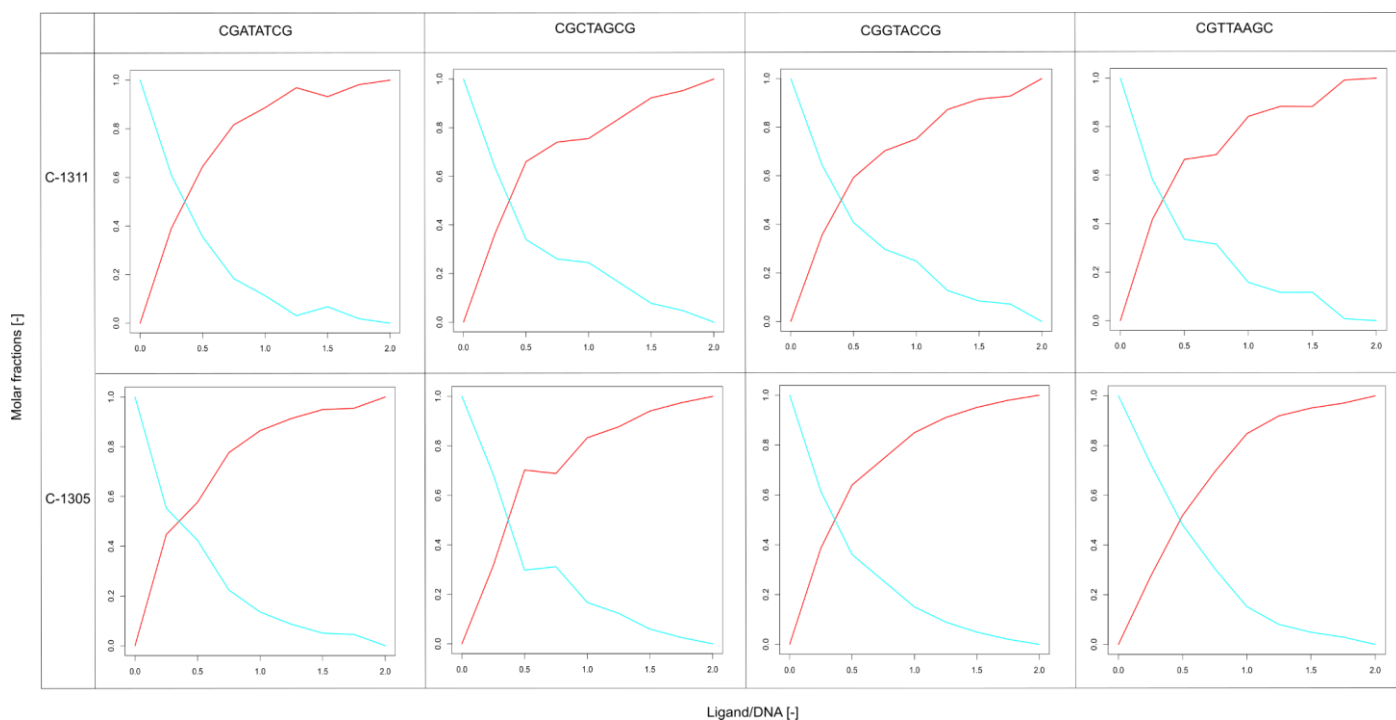

**Figure S8.** UV-VIS and chemometric analysis of C-1305 and C-1311 binding to DNA duplexes: molar fractions.

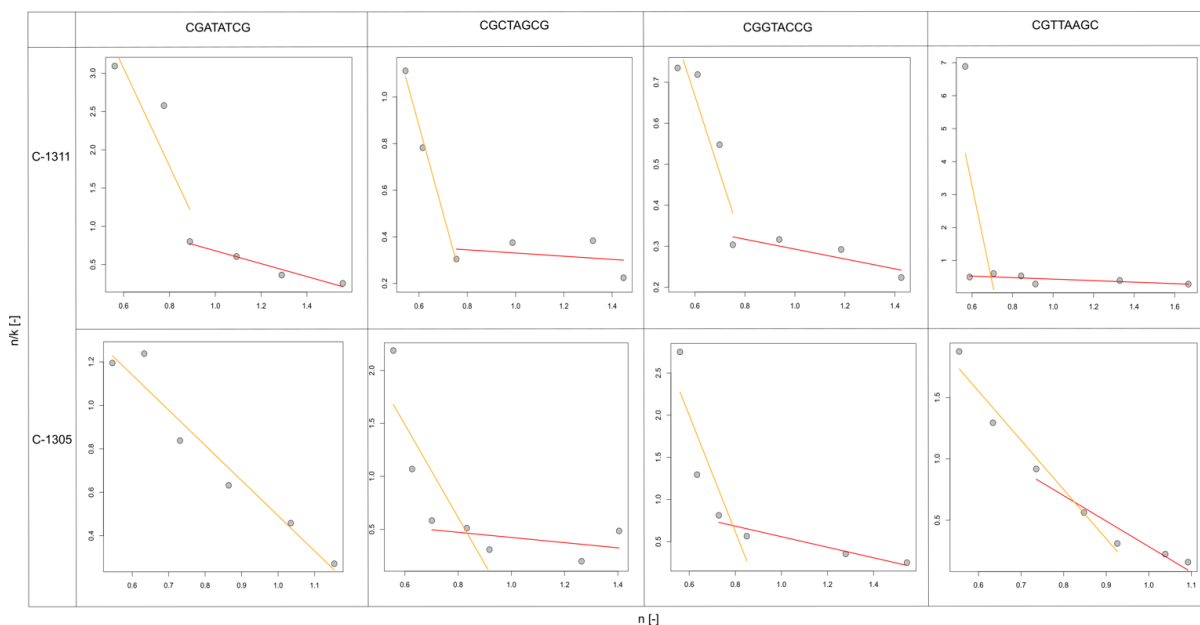

**Figure S9.** UV-VIS and chemometric analysis of C-1305 and C-1311 binding to DNA duplexes: Scatchard plots.

**Table S3.** Interactions of unsymmetrical bisacridines (UAs), i.e. C-2028, C-2041, C-2045, and C-2053, with dsDNA duplexes.

| Oligonucleotide codename | Sequence 5'-3' | Binding site in the case of C-2028 | Binding site in the case of C-2041 | Binding site in the case of C-2045 | Binding site in the case of C-2053 |
|--------------------------|----------------|------------------------------------|------------------------------------|------------------------------------|------------------------------------|
| U1                       | CGATGCATCG     | -                                  | -                                  | -                                  | -                                  |
| U2                       | CGTAGCTACG     | -                                  | -                                  | -                                  | -                                  |
| U3                       | CTGACGTCAG     | -                                  | -                                  | -                                  | -                                  |
| U4                       | CTAGCGCTAG     | -                                  | -                                  | -                                  | -                                  |

**Table S4.** The definition of distance restraints used in molecular dynamics simulations. When the distance between two protons fits between 'down' and 'up1' values: no potential is being used to bring the respective protons closer; when the distance fits between 'up1' and 'up2' or its value is lower than 'down': a quadratic potential is being added; when the distance exceeds 'up2' limit: the potential becomes linear.

| Distance restraint definition:             | down [nm] | up1 [nm] | up2 [nm] |
|--------------------------------------------|-----------|----------|----------|
| <b>dsDNA/ligand intermolecular contact</b> |           |          |          |
| strong                                     | 0.2000    | 0.3250   | 0.4250   |
| medium                                     | 0.2500    | 0.4500   | 0.5500   |
| weak                                       | 0.3000    | 0.6000   | 0.7000   |
| <b>Watson-Crick hydrogen bonds</b>         |           |          |          |
| A=T hydrogen bond: AN1-TH3                 | 0.1760    | 0.2160   | 0.3160   |
| A=T hydrogen bond: AH6-TO4                 | 0.1850    | 0.2250   | 0.3250   |
| G≡C hydrogen bond: GH2-CO2                 | 0.1680    | 0.2080   | 0.3080   |
| G≡C hydrogen bond: GH1-CN3                 | 0.1800    | 0.2200   | 0.3200   |
| G≡C hydrogen bond: GO6-CH4                 | 0.1800    | 0.2200   | 0.3200   |

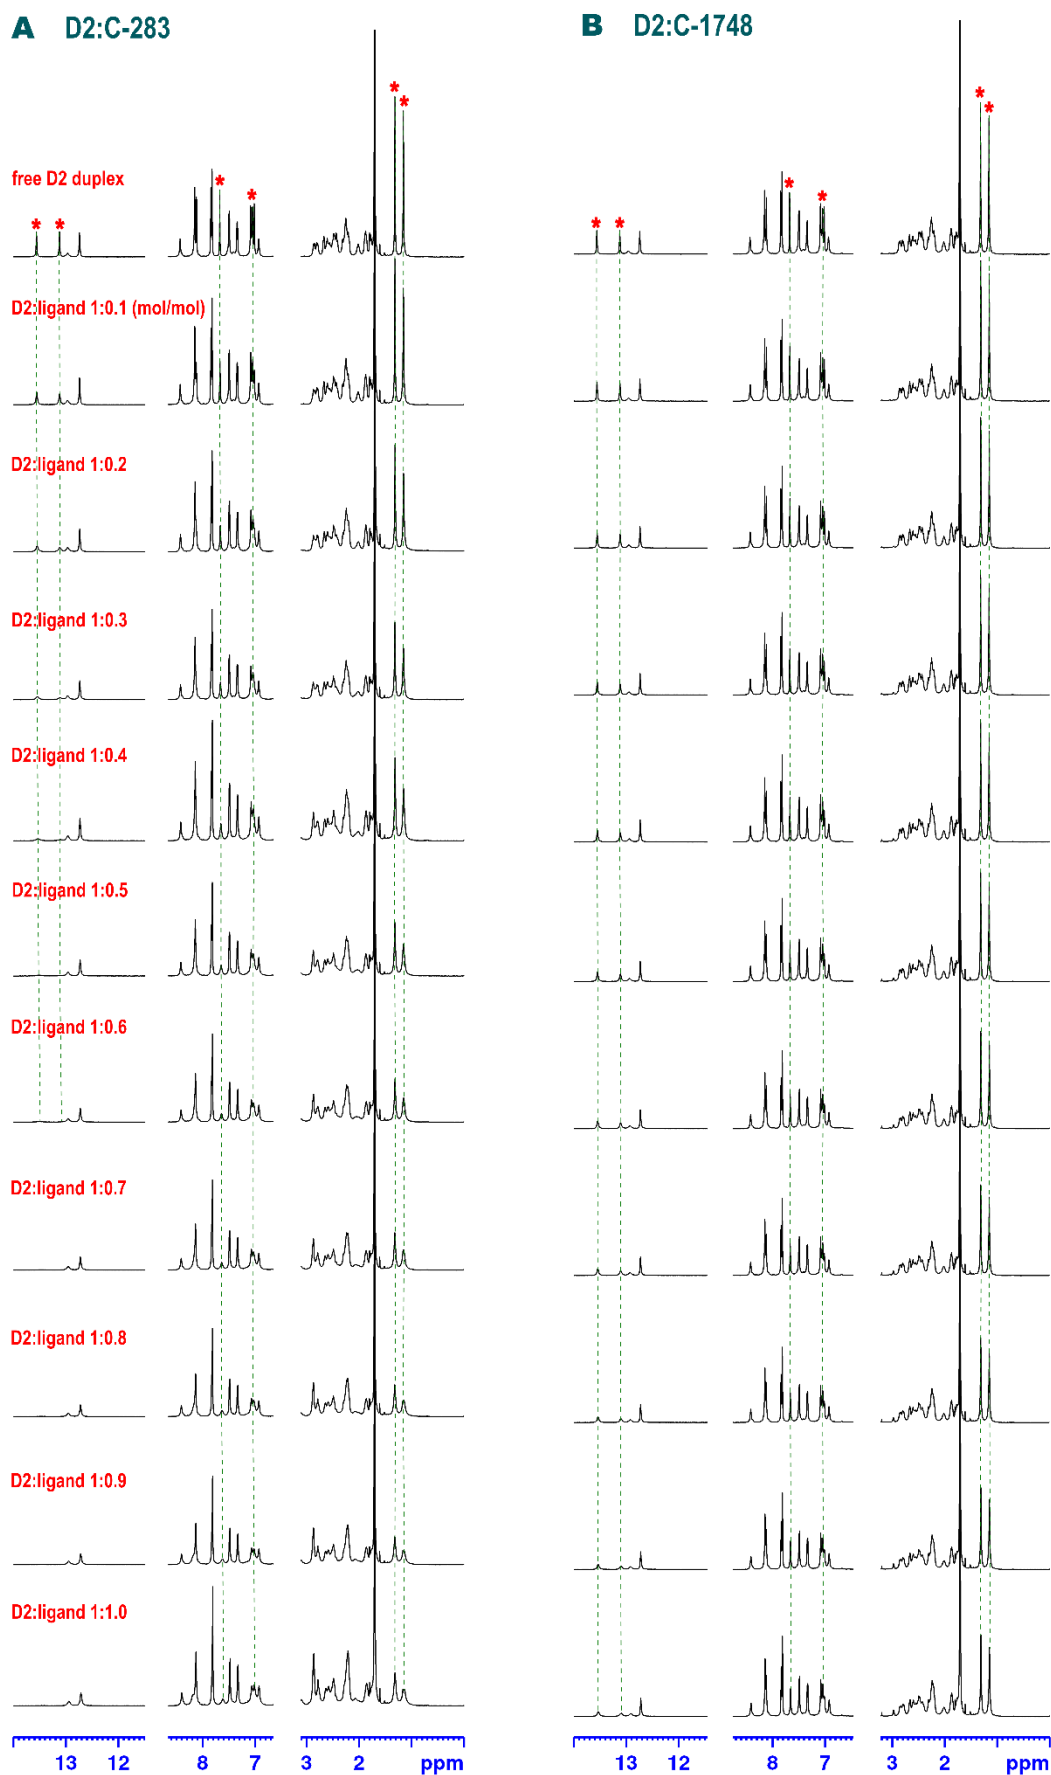

**Figure S10.** Titration experiments, performed for Nitracrine (panel **A**) and C-1748 (panel **B**), using d(CGATATCG)<sub>2</sub> (**D2**) dsDNA hosting duplex. Protons of the DNA, which were most notably affected by a ligand's presence, i.e. imino protons T4 & T6 and unexchangeable protons A3H2, A5H2, T4H6, T6H6, T4CH<sub>3</sub> and T6CH<sub>3</sub> were marked with red asterisks (\*).
